# Supplementary material for: Sulforaphane Exposure Prevents Cadmium-Induced Toxicity and Mitochondrial Dysfunction in the Nematode Caenorhabditis elegans by Regulating the Insulin/Insulin-like Growth Factor Signaling (IIS) Pathway
Source: MDPI journal article supplement (doi:10.3390/antiox13050584), 2024-05-09
Supplement: s1 [file s1]

## Supplementary material

**Table S1.** Characterization of *C. elegans* wildtype and mutant strains.

| Strain name and WB ID | Genotype                | Description                                                                                                                                                                                                                                                                                                                                                                                                                                                                                                                                          | Ref     |
|-----------------------|-------------------------|------------------------------------------------------------------------------------------------------------------------------------------------------------------------------------------------------------------------------------------------------------------------------------------------------------------------------------------------------------------------------------------------------------------------------------------------------------------------------------------------------------------------------------------------------|---------|
| N2                    | Wild type               | <i>C. elegans</i> was isolated in 1951 by W. L. Nicholas in Bristol from mushroom compost from a garden. Only a tiny part of the population is male; most are hermaphrodites. Its development has been described as lasting 3 days with a lifespan of 3 weeks. During their fertile stage, they can have an average of 300 eggs.                                                                                                                                                                                                                     | [32]    |
| VC128                 | <i>mtl-2(gk125) V</i>   | The metallothionein 2 enables Cd ion binding activity and zinc ion binding activity. Involved in response to Cd ion and response to heat. Mutant strain. T08G5.10. Superficially wild type. Made by Mark Edgley.                                                                                                                                                                                                                                                                                                                                     | [33]    |
| RB1623                | <i>cdr-2(ok1996) V</i>  | A gene involved in regulating protein deneddylation and stress response to cadmium ion. Predicted to be located in the cytoplasm. Mutant strain. C54D10.1. Homozygous. Outer Left sequence: GTTGGTGGCGTGAAGAATTT. Outer right Sequence: ATTCCGCTGCAAAATTAACG. Inner Left sequence: TGTCCTGGACAGCAACACA. Inner right sequence: AGCGTGTTCGCAAAGAGATT. Inner primer PCR Length: 2727 bp. Deletion Size: 1109 bp. Deletion left flank: ATTTTGGAATACCAATGCTTCTGACAAGAA. Deletion right flank: AAAAAAATCAAGAAGAGTTTACAAATTTT. Made by OMRF Knockout Group. | [33]    |
| TK22                  | <i>mev-1(kn1) III</i>   | <i>mev-1</i> encodes the <i>C. elegans</i> ortholog for human mitochondrial succinate dehydrogenase cytochrome b560 subunit, the mutation of which is associated with a significantly decreased life span, increased reactive oxygen species, and severely impaired reproduction. Methylviologen (paraquat) sensitive. Made by Naoaki Ishii.                                                                                                                                                                                                         | [34,35] |
| TJ1052                | <i>age-1(hx546) II.</i> | Mutant strain. Long life. Normal fertility. Not temperature sensitive. Stress tolerant. Made by Hutchinson and Johnson.                                                                                                                                                                                                                                                                                                                                                                                                                              | [36]    |

|                |                                     |                                                                                                                                                                                                                                                                                                                                                                                                                                                                                                                                           |              |
|----------------|-------------------------------------|-------------------------------------------------------------------------------------------------------------------------------------------------------------------------------------------------------------------------------------------------------------------------------------------------------------------------------------------------------------------------------------------------------------------------------------------------------------------------------------------------------------------------------------------|--------------|
| <b>QV225</b>   | <i>skn-1(zj15) IV</i>               | SKN-1/Nrf2 proteins are members of the cap 'n' collar (CNC) family of transcription factors that are master regulators of oxidative stress resistance and longevity. <i>skn-1(zj15)</i> is a point mutation in an intron that causes mis-splicing of a fraction of mRNA and strongly reduces wildtype mRNA levels of the two long <i>skn-1a/c</i> variants. Hypomorphic allele of <i>skn-1</i> that may be propagated as a homozygote. High rate of embryonic lethality and slightly lower brood size compared to N2. Made by Keith Choe. | [37]         |
| <b>GR2245</b>  | <i>skn-1(mg570) IV</i>              | <i>skn-1(mg570)</i> mutants lack SKN-1a but retain other SKN-1 isoforms. SKN-1a/Nrf1 is an unusual transcription factor associated with the endoplasmic reticulum via an N-terminal transmembrane domain. Mutant strain. Superficially wild type. Made by Nicholas Lehrbach.                                                                                                                                                                                                                                                              | [38,39]      |
| <b>GR1307</b>  | <i>daf-16(mgDf50)I</i>              | The <i>daf-16</i> gene produces the sole <i>C. elegans</i> equivalent of the Forkhead box O (FOXO) transcription factor. Deficiency completely eliminates the <i>daf-16</i> coding region. Makes partial dauers on pheromone. Made by Shoshanna Gottlieb                                                                                                                                                                                                                                                                                  | [35]         |
| <b>SJ4143</b>  | <i>zcls17 [ges-1::GFP(mit)]</i>     | Stable transgenic line expressing GFP in mitochondria of intestinal cells. Made by Cristina Benedetti.                                                                                                                                                                                                                                                                                                                                                                                                                                    | [40,41]<br>] |
| <b>QQ202</b>   | <i>daf-2(cv20[daf-2::GFP]) III</i>  | Superficially wildtype. Made by Jeff Simske.                                                                                                                                                                                                                                                                                                                                                                                                                                                                                              | ---          |
| <b>OH16024</b> | <i>daf-16(ot971[daf-16: GFP]) I</i> | The CRISPR allele of <i>daf-16</i> is tagged at the C-terminus with GFP. Made by Ulkar Aghayeva.                                                                                                                                                                                                                                                                                                                                                                                                                                          | [42]         |

Cd: cadmium, CNC: cap 'n' collar, CRISPR: clustered regularly interspaced short palindromic repeats, FOXO4: forkhead box O4, GFP: green fluorescent protein, Mit: mitochondria, mRNA: messenger RNA, Mtl-2: metallothionein 2, Nrf2: nuclear factor erythroid 2-related factor 2, PCR: polymerase chain reaction.

## a) Graphpad prism 5

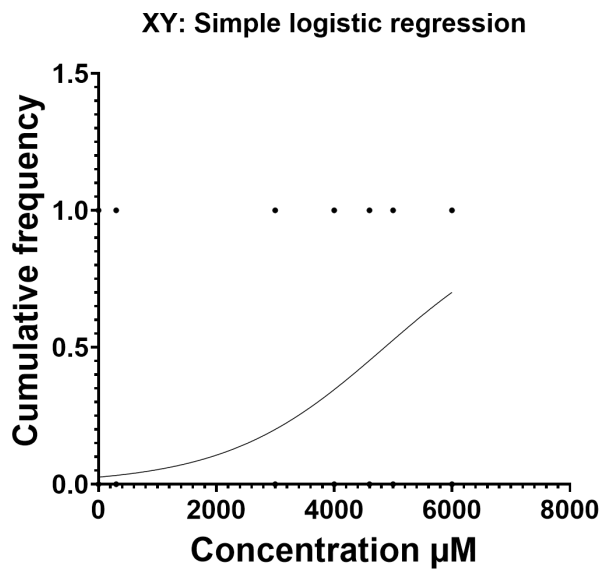

|                                                   |              |
|---------------------------------------------------|--------------|
| Std. Error                                        |              |
| X at 50%                                          | 79.14        |
| 95% Confidence Intervals                          |              |
| X at 50%                                          | 4707 to 5019 |
| Goodness of Fit                                   |              |
| Tjur's R squared                                  | 43           |
| Cox-Snell's R squared                             | 0.8208       |
| Model deviance, G squared                         | 3966         |
| Data summary                                      |              |
| Rows in table                                     | 1960         |
| Rows skipped (missing data)                       | 0            |
| Rows analyzed (#observations)                     | 1960         |
| Number of 1                                       | 642          |
| Number of 0                                       | 1318         |
| Number of parameter estimates                     | 2            |
| <b><math>LC_{50} = 4\ 858\ \mu\text{M}</math></b> |              |

## b) Probit analysis

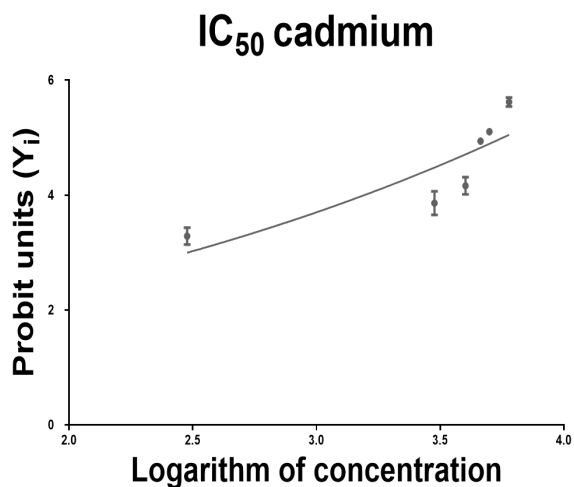

|                                                             |           |               |
|-------------------------------------------------------------|-----------|---------------|
| $R^2$                                                       | 0.7204    |               |
| Slope                                                       | 6.1334    |               |
| Intercept                                                   | -17.61    |               |
| Lethal concentration 16                                     | 3344.333  | $\mu\text{M}$ |
| Lethal concentration 84                                     | 7054.016  | $\mu\text{M}$ |
| Standard deviation (S)                                      | 18.54.841 |               |
| Population size ( $Y_i = 0.07-0.93$ ) $N'$                  | 1377      |               |
| Standard error of measurement (SEM)                         | 70.689    | $\mu\text{M}$ |
| $t(\alpha=0.05, \text{gl}=N-2)$                             | 1.96      |               |
| $t_{0.05} \cdot \text{SEM}$                                 | 138.5514  |               |
| Lower Control Limit (LCL)                                   | 4719      | $\mu\text{M}$ |
| Upper Control Limit (UCL)                                   | 4996      | $\mu\text{M}$ |
| <b><math>LC_{50} = 4\ 857 \pm 138.6\ \mu\text{M}</math></b> |           |               |

**Figure S1: Calculation of the mean lethal concentration ( $LC_{50}$ ).** A)  $LC_{50}$  was calculated using the GraphPad prism 10, and B)  $LC_{50}$  was calculated using Probit analysis.
